# Supplementary material for: Odimet®: A Pioneering Tele-Health Tool to Empower Dietary Treatment and the Acute Management of Inborn Errors of Metabolism—An Assessment of Its Effectiveness during the COVID Pandemic
Source: MDPI journal article supplement (doi:10.3390/nu16030423), 2024-01-31
Supplement: s1 [file s1]

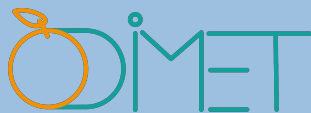

Normal Diet Id.74500

NAME: MSUD PATIENT

AGE: 0

WEIGHT: 21 kg

HEIGHT: 0 cm

IMC: 0

DATE: 2022-04-26

CONTENT

| DIET PRODUCTS           |                                   |                                                      |
|-------------------------|-----------------------------------|------------------------------------------------------|
| CHICKPEA (15 g)         | MACARONI (SANAVI) (95 g)          | OLIVE OIL (10 g)                                     |
| OLIVE (40 g)            | PUMPKIN (90 g)                    | CANNED ASPARAGUS (20 g)                              |
| COOKED POTATO (70 g)    | SWEET CORN, YELLOW, CANNED (35 g) | SOLIS FRIED TOMATO (30 g)                            |
| EROSKI MUSHROOMS (45 g) | MSUD ANAMIX JUNIOR (108 g)        | VEGAN CHEESE VIOLIFE MOZZARELLA FLAVOR SLICES (30 g) |

DIET CALCS

| VARIABLE        | kCal    | %     | VARIABLE                    | VALUE | FATS DISTRIBUTION | %     |
|-----------------|---------|-------|-----------------------------|-------|-------------------|-------|
| Proteins        | 154.4   | 13.37 | Kcal/ml (Liquid Vol.: 0 ml) | 0     | Saturated         | 8.38  |
| Fats            | 333.36  | 28.86 | Kcal/Kg (Weight: 21 Kg)     | 55    | Monounsaturated   | 15.26 |
| Carbohydrates   | 667.28  | 57.77 | Taotal proteins/Kg          | 1.84  | Polyunsaturated   | 3.05  |
| Energetic value | 1155.04 |       | Natural proteins/Kg         | 0.4   |                   |       |

COMPONENTS

| PROTEINS         |            | FATS            |         | CARBOHYDRATES |          | MINERALS   |            | VITAMINS    |            |
|------------------|------------|-----------------|---------|---------------|----------|------------|------------|-------------|------------|
| Total proteins   | 38.6 g     | Total fat       | 37.04 g | Carbohydrates | 166.82 g | Sodium     | 886.04 mg  | Vitamin A   | 803.4 mcg  |
| Natural proteins | 8.36 g     | Saturated       | 10.75 g | Total sugars  | 10.31 g  | Potassium  | 1291.05 mg | Vitamin B1  | 1 mg       |
| Total Nitrogen   | 6.19 g     | C 14:0          | 0.01 g  | Sucrose       | 1.52 g   | Calcium    | 1244.29 mg | Vitamin B2  | 0.97 mg    |
| Valine           | 290.85 mg  | C 16:0          | 1.77 g  | Glucose       | 0.36 g   | Phosphorus | 914.79 mg  | Vitamin B3  | 4.38 mg    |
| Leucine          | 431.7 mg   | C 18:0          | 0.3 g   | Fructose      | 0.33 g   | Magnesium  | 184.09 mg  | Vitamin B6  | 1.14 mg    |
| Isoleucine       | 256.6 mg   | Monounsaturated | 19.58 g | Lactose       | 0 g      | Iron       | 15.48 mg   | Folates     | 363.55 mcg |
| Phenylalanine    | 2328.4 mg  | C 16:1          | 0.17 g  | Galactose     | 0.03 g   | Fluoride   | 0 mcg      | Vitamin B12 | 2.15 mcg   |
| Tryptophan       | 671.35 mg  | C 18:1          | 10.5 g  | Maltose       | 0.1 g    | Copper     | 1.17 mg    | Vitamin C   | 65.21 mg   |
| Lysine           | 2731.15 mg | Polyunsaturated | 3.92 g  | Starch        | 0 g      | Selenium   | 35.92 mcg  | Vitamin D   | 22.68 mcg  |
| Arginine         | 2200.8 mg  | C 18:2          | 1.86 g  | Fiber         | 19.01 g  | Manganese  | 1.67 mg    | Vitamin E   | 12.32 mg   |
| Histidine        | 1127 mg    | C 18:3          | 0.14 g  |               |          | Iodine     | 150.49 mcg | Vitamin K   | 33.77 mcg  |
| Methionine       | 910.55 mg  | C>20            | 0 g     |               |          | Zinc       | 7.01 mg    |             |            |
| Threonine        | 3089 mg    | MCT             | 0.58 g  |               |          |            |            |             |            |
| Tyrosine         | 2917.95 mg | DHA             | 0 g     |               |          |            |            |             |            |
|                  |            | EPA             | 0 g     |               |          |            |            |             |            |
|                  |            | Cholesterol     | 0.67 mg |               |          |            |            |             |            |



Normal Diet Id.78457

NAME: MSUD. Emergency diet treatment during viral infection  
AGE: 7      WEIGHT: 21 kg      HEIGHT: 118 cm      IMC: 15.08      DATE: 2022-06-28

CONTENT

| DIET PRODUCTS            |                            |                                                      |
|--------------------------|----------------------------|------------------------------------------------------|
| MACARONI (SANAVI) (95 g) | SOLIS FRIED TOMATO (30 g)  | VEGAN CHEESE VIOLIFE MOZZARELLA FLAVOR SLICES (30 g) |
| OLIVE OIL (40 g)         | EROSKI MUSHROOMS (45 g)    | PROZERO (DAIRY SUBSTITUTE) (500 g)                   |
| PUMPKIN (90 g)           | MSUD ANAMIX JUNIOR (125 g) |                                                      |

DIET CALCS

| VARIABLE        | kCal    | %     | VARIABLE                    | VALUE | FATS DISTRIBUTION | %     |
|-----------------|---------|-------|-----------------------------|-------|-------------------|-------|
| Proteins        | 151.24  | 9.34  | Kcal/ml (Liquid Vol.: 0 ml) | 0     | Saturated         | 13.33 |
| Fats            | 743.49  | 45.9  | Kcal/Kg (Weight: 21 Kg)     | 77.13 | Monounsaturated   | 25.53 |
| Carbohydrates   | 725.08  | 44.76 | Taotal proteins/Kg          | 1.8   | Polyunsaturated   | 4.14  |
| Energetic value | 1619.81 |       | Natural proteins/Kg         | 0.13  |                   |       |

COMPONENTS

| PROTEINS         |           | FATS            |         | CARBOHYDRATES |          | MINERALS   |            | VITAMINS    |           |
|------------------|-----------|-----------------|---------|---------------|----------|------------|------------|-------------|-----------|
| Total proteins   | 37.81 g   | Total fat       | 82.61 g | Carbohydrates | 181.27 g | Sodium     | 725.9 mg   | Vitamin A   | 857.1 mcg |
| Natural proteins | 2.81 g    | Saturated       | 23.99 g | Total sugars  | 24.94 g  | Potassium  | 928.5 mg   | Vitamin B1  | 0.96 mg   |
| Total Nitrogen   | 6.1 g     | C 14:0          | 0.01 g  | Sucrose       | 0 g      | Calcium    | 1373.9 mg  | Vitamin B2  | 1.01 mg   |
| Valine           | 31.5 mg   | C 16:0          | 4.55 g  | Glucose       | 0 g      | Phosphorus | 924.6 mg   | Vitamin B3  | 3.04 mg   |
| Leucine          | 41.4 mg   | C 18:0          | 0.78 g  | Fructose      | 0 g      | Magnesium  | 164.55 mg  | Vitamin B6  | 0.96 mg   |
| Isoleucine       | 27.9 mg   | Monounsaturated | 45.94 g | Lactose       | 0 g      | Iron       | 14.35 mg   | Folates     | 276.9 mcg |
| Phenylalanine    | 2386.4 mg | C 16:1          | 0.51 g  | Galactose     |          | Fluoride   | 0 mcg      | Vitamin B12 | 2.38 mcg  |
| Tryptophan       | 710.8 mg  | C 18:1          | 28.52 g | Maltose       | 0 g      | Copper     | 0.89 mg    | Vitamin C   | 60.6 mg   |
| Lysine           | 2773.6 mg | Polyunsaturated | 7.46 g  | Starch        | 0 g      | Selenium   | 38.77 mcg  | Vitamin D   | 26.25 mcg |
| Arginine         | 2073.6 mg | C 18:2          | 3.9 g   | Fiber         | 14.84 g  | Manganese  | 1.36 mg    | Vitamin E   | 17.19 mg  |
| Histidine        | 1139.4 mg | C 18:3          | 0.3 g   |               |          | Iodine     | 173.89 mcg | Vitamin K   | 42.57 mcg |
| Methionine       | 959.9 mg  | C>20            | 0 g     |               |          | Zinc       | 6.92 mg    |             |           |
| Threonine        | 3351.1 mg | MCT             | 0.68 g  |               |          |            |            |             |           |
| Tyrosine         | 3187.8 mg | DHA             | 0 g     |               |          |            |            |             |           |
|                  |           | EPA             | 0 g     |               |          |            |            |             |           |
|                  |           | Cholesterol     | 0.67 mg |               |          |            |            |             |           |
